# Supplementary material for: Diagnostic Power of Serum Creatinine/Cystatin C Ratio for Identifying Low MRI-Muscle Volume and Low Grip Strength: Data From 9 731 to 149 707 UK Biobank Older Adults
Source: PubMed Central journal article supplement — J Gerontol A Biol Sci Med Sci. 2024 Nov 14;80(1):glae274. doi: 10.1093/gerona/glae274 (PMC11655890; doi:10.1093/gerona/glae274), 2024-11-14

Supplemental eTable 1. UK Biobank field IDs used to extract data for this project.

| Field                                     | Field ID                                       | Instance            | ICD codes                                                           |
|-------------------------------------------|------------------------------------------------|---------------------|---------------------------------------------------------------------|
| Creatinine                                | 30700                                          | Baseline            |                                                                     |
| Cystatin C                                | 30720                                          | Baseline            |                                                                     |
| Hand grip strength (left)                 | 46                                             | Imaging             |                                                                     |
| Hand grip strength (right)                | 47                                             | Imaging             |                                                                     |
| Total thigh fat-free muscle volume        | 22409                                          | Imaging             |                                                                     |
| Arms lean mass                            | 23258                                          | Imaging             |                                                                     |
| Legs lean mass                            | 23275                                          | Imaging             |                                                                     |
| Height                                    | 12144                                          | Imaging             |                                                                     |
| Body mass index (BMI)                     | 21001                                          | Baseline<br>Imaging |                                                                     |
| Age                                       | 21003                                          | Baseline            |                                                                     |
| Sex                                       | 31                                             | Baseline            |                                                                     |
| Date of attending assessment centre       | 53                                             | Baseline<br>Imaging |                                                                     |
| Ethnicity                                 | 21000                                          | Baseline            |                                                                     |
| Education                                 | 6138                                           | Baseline            |                                                                     |
| Townsend deprivation index at recruitment | 189                                            | Baseline            |                                                                     |
| Smoking status                            | 20116                                          | Baseline            |                                                                     |
| IPAQ physical activity group              | 22032                                          | Baseline            |                                                                     |
| Alcohol intake frequency                  | 1558                                           | Baseline            |                                                                     |
| Cancer excluding non-melanoma skin cancer | 40005<br>41280<br>41281                        |                     | ICD-10: C00-C97<br>excluding C44<br>ICD-9: 140-209<br>excluding 172 |
| Diabetes                                  | 130706<br>130708<br>130710<br>130712<br>130714 |                     | E10<br>E11<br>E12<br>E13<br>E14                                     |
| Myocardial infarction                     | 131298<br>131300<br>131302<br>131304<br>131306 |                     | I21<br>I22<br>I23<br>I24<br>I25                                     |
| Stroke                                    | 131360<br>131362<br>131364<br>131366<br>131368 |                     | I60<br>I61<br>I62<br>I63<br>I64                                     |
| Heart failure                             | 131354                                         |                     | I50                                                                 |
| Chronic kidney disease                    | 132032                                         |                     | N18                                                                 |

Supplemental eTable 2. Shows the prevalence of low FFMV, low ALM/BMI, low ALM/height<sup>2</sup> and low grip strength using age- and sex-specific normative values.

| Outcome and Cutpoint                                               |                                      | Low<br>(< Cutpoint) | High<br>(≥ Cutpoint) |
|--------------------------------------------------------------------|--------------------------------------|---------------------|----------------------|
| Grip Strength                                                      |                                      |                     |                      |
| T-score -2 in a 4-90-year Great British cohort                     | Women (<19 kg)                       | 15,212 (20.11%)     | 60,421 (79.89%)      |
|                                                                    | Men (<32 kg)                         | 10,644 (14.37%)     | 63,430 (85.64%)      |
| T-score -2.5 in a 4-90-year Great British cohort                   | Women (<16 kg)                       | 5,783 (7.65%)       | 69,850 (92.35%)      |
|                                                                    | Men (<27 kg)                         | 3,857 (5.21%)       | 70,217 (94.79%)      |
| 20 <sup>th</sup> percentile among the included sample              | Women (<18 kg)                       | 9,591 (12.68%)      | 66,042 (87.32%)      |
|                                                                    | Men (<33 kg)                         | 14,541 (19.63%)     | 59,533 (80.37%)      |
| FFMV                                                               |                                      |                     |                      |
| T-score -2 in middle-aged adults in the UK Biobank                 | Women (<6.21 liters)                 | 200 (4.66%)         | 4,093 (95.34%)       |
|                                                                    | Men (<9.61 liters)                   | 426 (7.83%)         | 5,012 (92.17%)       |
| T-score -2.5 in middle-aged adults (45-59 years) in the UK Biobank | Women (<5.62 liters)                 | 40 (0.93%)          | 4,254 (99.07%)       |
|                                                                    | Men (<8.75 liters)                   | 120 (2.21%)         | 5,318 (97.79%)       |
| 20 <sup>th</sup> percentile among the included samples             | Women (<6.97 liters)                 | 859 (20.01%)        | 3,434 (79.99%)       |
|                                                                    | Men (<10.40 liters)                  | 1,088 (20.01%)      | 4,350 (79.99%)       |
| ALM/BMI                                                            |                                      |                     |                      |
| T-score -2                                                         | Women (<0.512 kg/kg/m <sup>2</sup> ) | 162 (3.60%)         | 4,342 (96.40%)       |
|                                                                    | Men (<0.789 kg/kg/m <sup>2</sup> )   | 615 (10.68%)        | 5,141 (89.32%)       |
| 20 <sup>th</sup> percentile among the included samples             | Women (<0.582 kg/kg/m <sup>2</sup> ) | 901 (20.00%)        | 3,603 (80.00%)       |
|                                                                    | Men (<0.830 kg/kg/m <sup>2</sup> )   | 1,151 (20.00%)      | 4,605 (80.00%)       |
| ALM/Height <sup>2</sup>                                            |                                      |                     |                      |

|                                                                                              |                                     |                |                |
|----------------------------------------------------------------------------------------------|-------------------------------------|----------------|----------------|
| T-score -2<br><br><br><br>20 <sup>th</sup><br>percentile<br>among the<br>included<br>samples | Women (<5.50<br>kg/m <sup>2</sup> ) | 543 (11.75%)   | 4,078 (88.25%) |
|                                                                                              | Men (<7.00<br>kg/m <sup>2</sup> )   | 911 (15.54%)   | 4,952 (84.46%) |
|                                                                                              | Women (<5.71<br>kg/m <sup>2</sup> ) | 924 (20.00%)   | 3,697 (80.00%) |
|                                                                                              | Men (<7.13<br>kg/m <sup>2</sup> )   | 1,173 (20.01%) | 4,690 (79.99%) |

Age- and sex-specific normative values are from population studies using grip strength (19), FFMV (20), ALM/Height<sup>2</sup> (1) and ALM/BMI (21).

Supplemental eTable 3. Unadjusted associations of the outcomes across quartile groups of Cr:Cys.

| <b>Imaging</b>                                     | <b>All</b>          | <b>Q1</b>                             | <b>Q2</b>                                     | <b>Q3</b>                                     | <b>Q4</b>                          | <b>P-Value</b> |
|----------------------------------------------------|---------------------|---------------------------------------|-----------------------------------------------|-----------------------------------------------|------------------------------------|----------------|
|                                                    | <b>(n = 9,731)</b>  | <b>&lt;0.81</b><br><b>(n = 2,433)</b> | <b>0.81 to &lt;0.91</b><br><b>(n = 2,433)</b> | <b>0.91 to &lt;1.01</b><br><b>(n = 2,433)</b> | <b>≥1.01</b><br><b>(n = 2,433)</b> |                |
| <b>FFMV (liters)</b>                               | 9.95 ± 2.32         | 8.25 ± 1.72                           | 9.52 ± 2.2                                    | 10.66 ± 2.10                                  | 11.38 ± 1.93                       | <0.001         |
| <b>Imaging</b>                                     | <b>All</b>          | <b>Q1</b>                             | <b>Q2</b>                                     | <b>Q3</b>                                     | <b>Q4</b>                          | <b>P-Value</b> |
|                                                    | <b>(n = 10,260)</b> | <b>&lt;0.81</b><br><b>(n = 2,565)</b> | <b>0.81 to &lt;0.91</b><br><b>(n = 2,565)</b> | <b>0.91 to &lt;1.01</b><br><b>(n = 2,565)</b> | <b>≥1.01</b><br><b>(n = 2,565)</b> |                |
| <b>ALM/BMI (kg/kg/m<sup>2</sup>)</b>               | 0.8 ± 0.16          | 0.68 ± 0.13                           | 0.78 ± 0.15                                   | 0.85 ± 0.15                                   | 0.91 ± 0.13                        | <0.001         |
| <b>ALM (kg)</b>                                    | 20.97 ± 4.71        | 17.85 ± 3.73                          | 20.29 ± 4.68                                  | 22.20 ± 4.42                                  | 23.55 ± 3.89                       | <0.001         |
| <b>BMI at the imaging visit (kg/m<sup>2</sup>)</b> | 26.28 ± 3.99        | 26.61 ± 4.68                          | 26.21 ± 4.02                                  | 26.17 ± 3.74                                  | 26.14 ± 3.38                       | 0.19           |
| <b>Imaging</b>                                     | <b>All</b>          | <b>Q1</b>                             | <b>Q2</b>                                     | <b>Q3</b>                                     | <b>Q4</b>                          | <b>P-Value</b> |
|                                                    | <b>(n = 10,484)</b> | <b>&lt;0.81</b><br><b>(n = 2,261)</b> | <b>0.81 to &lt;0.91</b><br><b>(n = 2,261)</b> | <b>0.91 to &lt;1.01</b><br><b>(n = 2,261)</b> | <b>≥1.01</b><br><b>(n = 2,261)</b> |                |
| <b>ALM/Height<sup>2</sup> (kg/m<sup>2</sup>)</b>   | 7.18 ± 1.11         | 6.59 ± 0.99                           | 7.01 ± 1.10                                   | 7.4 ± 1.06                                    | 7.72 ± 0.96                        | <0.001         |
| <b>ALM (kg)</b>                                    | 20.96 ± 4.72        | 17.85 ± 3.74                          | 20.25 ± 4.69                                  | 22.20 ± 4.42                                  | 23.55 ± 3.9                        | <0.001         |
| <b>Height (m)</b>                                  | 1.70 ± 0.09         | 1.64 ± 0.08                           | 1.69 ± 0.1                                    | 1.72 ± 0.09                                   | 1.74 ± 0.08                        | <0.001         |
|                                                    | <b>All</b>          | <b>Q1</b>                             | <b>Q2</b>                                     | <b>Q3</b>                                     | <b>Q4</b>                          | <b>P-Value</b> |
|                                                    |                     | <b>&lt;0.77</b>                       | <b>0.77 to &lt;0.87</b>                       | <b>0.87 to &lt;0.98</b>                       | <b>≥0.98</b>                       |                |
| <b>Baseline</b>                                    | (n = 149,707)       | (n = 37,426)                          | (n = 37,427)                                  | (n = 37,427)                                  | (n = 37,427)                       |                |
| <b>Grip strength (kg)</b>                          | 31.41 ± 10.8        | 24.29 ± 7.79                          | 28.94 ± 9.65                                  | 34.08 ± 10.3                                  | 38.3 ± 9.77                        | <0.001         |

Supplemental eTable 4. Fully-adjusted associations (predicted values and their 95% confidence intervals) for outcomes across quartile groups of the biomarker difference between Creatinine and Cystatin C.

|                      | Group | Q1                         | Q2                         | Q3                         | Q4                         | Non-linearity<br>P-Value | Association<br>P-Value |
|----------------------|-------|----------------------------|----------------------------|----------------------------|----------------------------|--------------------------|------------------------|
| <b>Grip Strength</b> | All   | 29.789<br>(29.68, 29.897)  | 31.328<br>(31.224, 31.427) | 31.516<br>(31.412, 31.617) | 32.989<br>(32.883, 33.098) | < 1e-323                 | 7.53E-25               |
|                      | Women | 22.255<br>(22.172, 22.334) | 23.036<br>(22.975, 23.103) | 23.606<br>(23.543, 23.669) | 24.391<br>(24.314, 24.465) | 5.32E-269                | 1.33E-08               |
|                      | Men   | 37.903<br>(37.788, 38.015) | 39.534<br>(39.44, 39.631)  | 40.232<br>(40.142, 40.317) | 40.968<br>(40.867, 41.077) | 7.45E-278                | 1.55E-24               |
|                      |       |                            |                            |                            |                            |                          |                        |
|                      | Group | Q1                         | Q2                         | Q3                         | Q4                         | Non-linearity<br>P-Value | Association<br>P-Value |
| <b>FFMV</b>          | All   | 9.781<br>(9.69, 9.87)      | 9.965<br>(9.876, 10.064)   | 9.894<br>(9.797, 9.99)     | 10.176<br>(10.09, 10.268)  | 1.73E-80                 | 3.58E-13               |
|                      | Women | 7.742<br>(7.68, 7.808)     | 7.747<br>(7.698, 7.799)    | 7.761<br>(7.711, 7.809)    | 7.974<br>(7.915, 8.033)    | 4.46E-49                 | 9.19E-09               |
|                      | Men   | 11.47<br>(11.391, 11.546)  | 11.68<br>(11.613, 11.746)  | 11.703<br>(11.635, 11.771) | 11.747<br>(11.668, 11.833) | 8.08E-39                 | 2.99E-09               |
|                      |       |                            |                            |                            |                            |                          |                        |
|                      | Group | Q1                         | Q2                         | Q3                         | Q4                         | Non-linearity<br>P-Value | Association<br>P-Value |
| <b>ALM/BMI</b>       | All   | 0.773<br>(0.767, 0.779)    | 0.802<br>(0.796, 0.808)    | 0.806<br>(0.8, 0.812)      | 0.833<br>(0.827, 0.839)    | 2.36E-37                 | 1.57E-03               |
|                      | Women | 0.63<br>(0.625, 0.635)     | 0.65<br>(0.646, 0.655)     | 0.665<br>(0.661, 0.669)    | 0.682<br>(0.677, 0.687)    | 1.05E-21                 | 7.02E-03               |
|                      | Men   | 0.892<br>(0.887, 0.898)    | 0.916<br>(0.911, 0.92)     | 0.924<br>(0.92, 0.929)     | 0.939<br>(0.934, 0.945)    | 2.84E-18                 | 2.36E-03               |
|                      |       |                            |                            |                            |                            |                          |                        |
|                      | Group | Q1                         | Q2                         | Q3                         | Q4                         | Non-linearity<br>P-Value | Association<br>P-Value |

|                               |       |                         |                         |                         |                         |          |          |
|-------------------------------|-------|-------------------------|-------------------------|-------------------------|-------------------------|----------|----------|
| <b>ALM/Height<sup>2</sup></b> | All   | 7.215<br>(7.171, 7.259) | 7.185<br>(7.145, 7.224) | 7.102<br>(7.062, 7.146) | 7.22<br>(7.179, 7.259)  | 2.03E-76 | 3.75E-05 |
|                               | Women | 6.475<br>(6.427, 6.529) | 6.326<br>(6.284, 6.372) | 6.265<br>(6.227, 6.305) | 6.324<br>(6.284, 6.366) | 6.38E-29 | 5.39E-04 |
|                               | Men   | 7.839<br>(7.792, 7.886) | 7.84<br>(7.802, 7.882)  | 7.815<br>(7.774, 7.856) | 7.853<br>(7.815, 7.897) | 6.53E-47 | 2.42E-04 |
|                               |       |                         |                         |                         |                         |          |          |

Supplemental eFigure 1. Flow chart of the final analytical sample in the imaging cohort for FFMV, ALM/BMI and ALM/Height<sup>2</sup>.

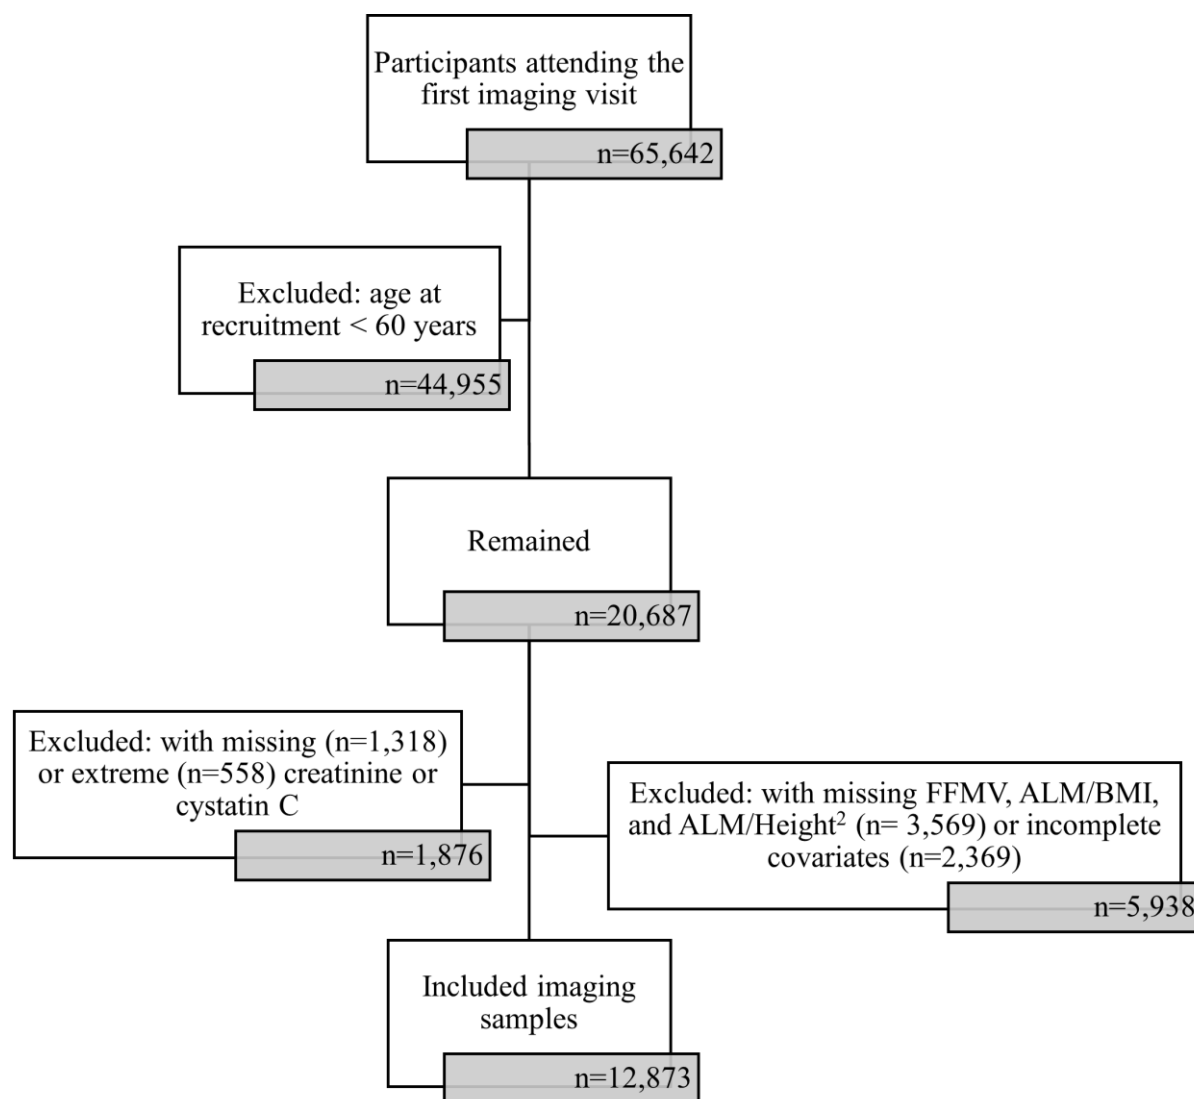

Supplemental eFigure 2. Flow chart of the final analytical sample in the baseline cohort for grip strength.

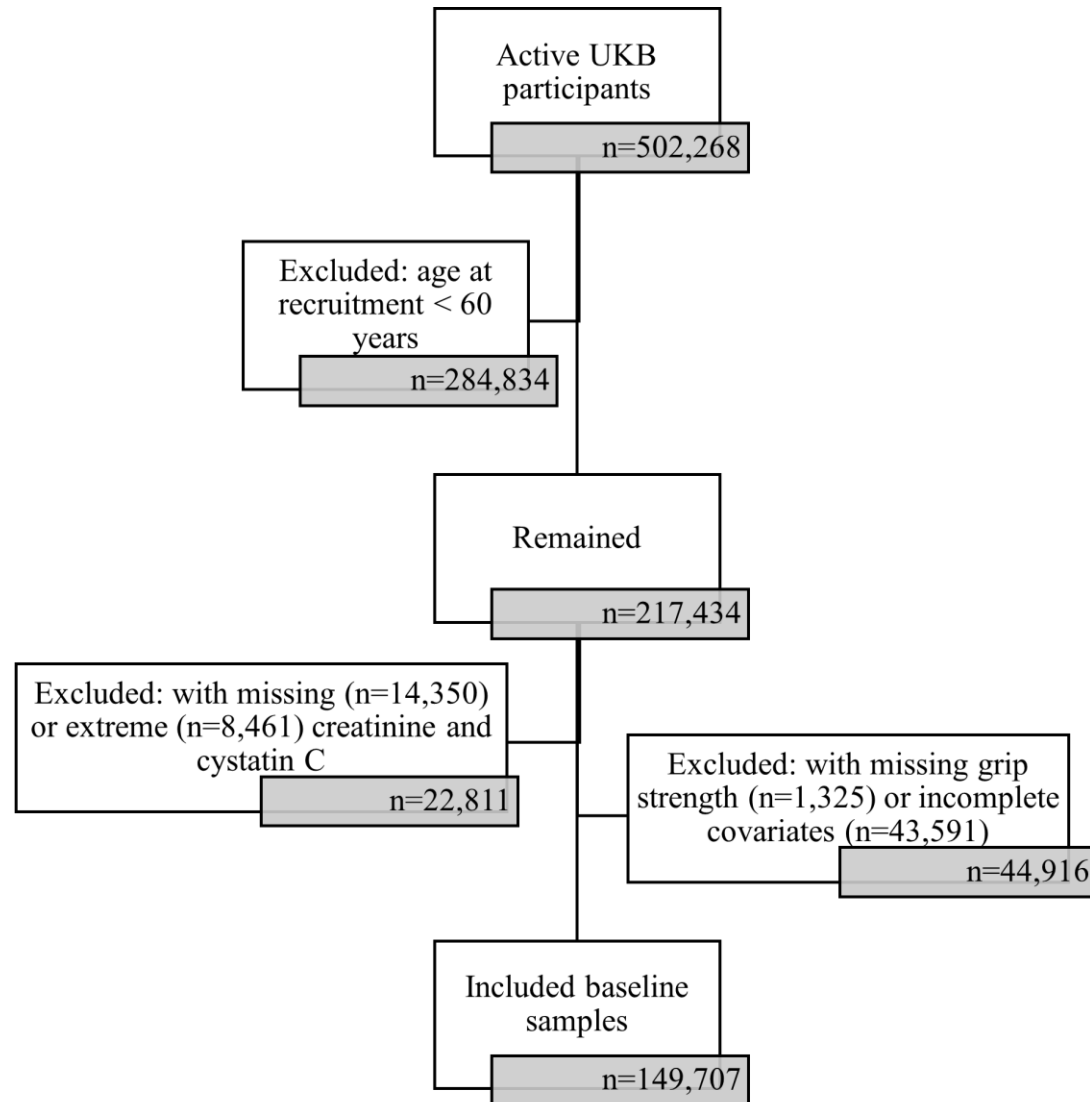

Supplemental eFigure 3. Means and their 95% confidence intervals for different outcomes across the quartile groups of Cr:Cyc, overall and by sex adjusting for covariates.

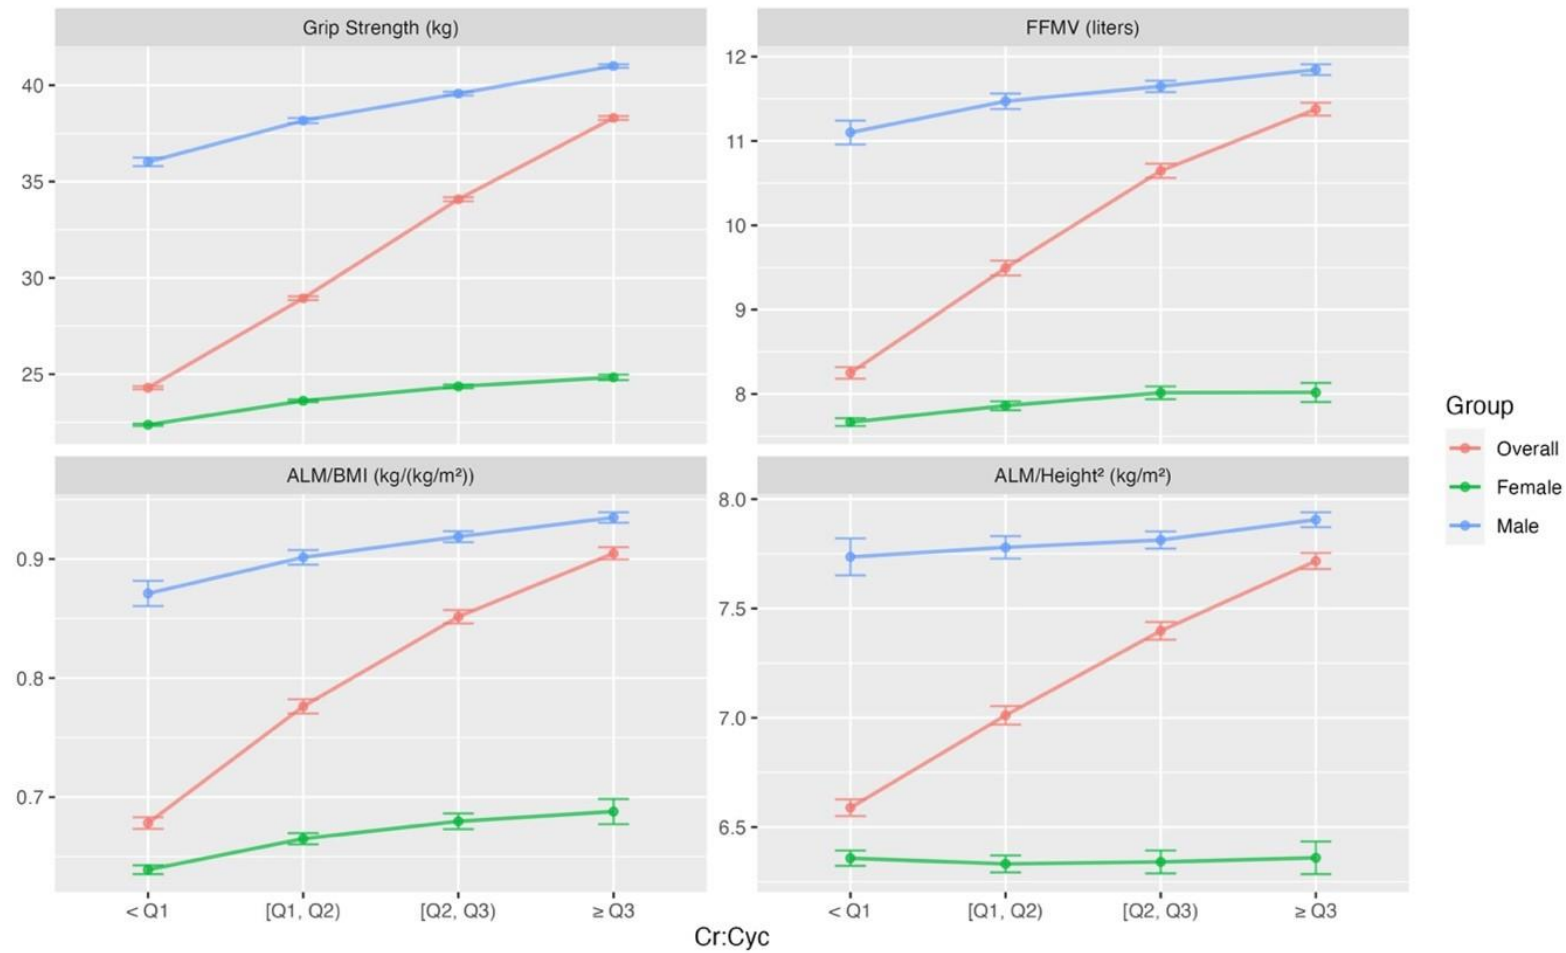

Supplemental eFigure 4. Receiver operator characteristic curves shows the diagnostic power of Cr:Cyc for identifying low FFMV using cutpoints. Models are unadjusted.

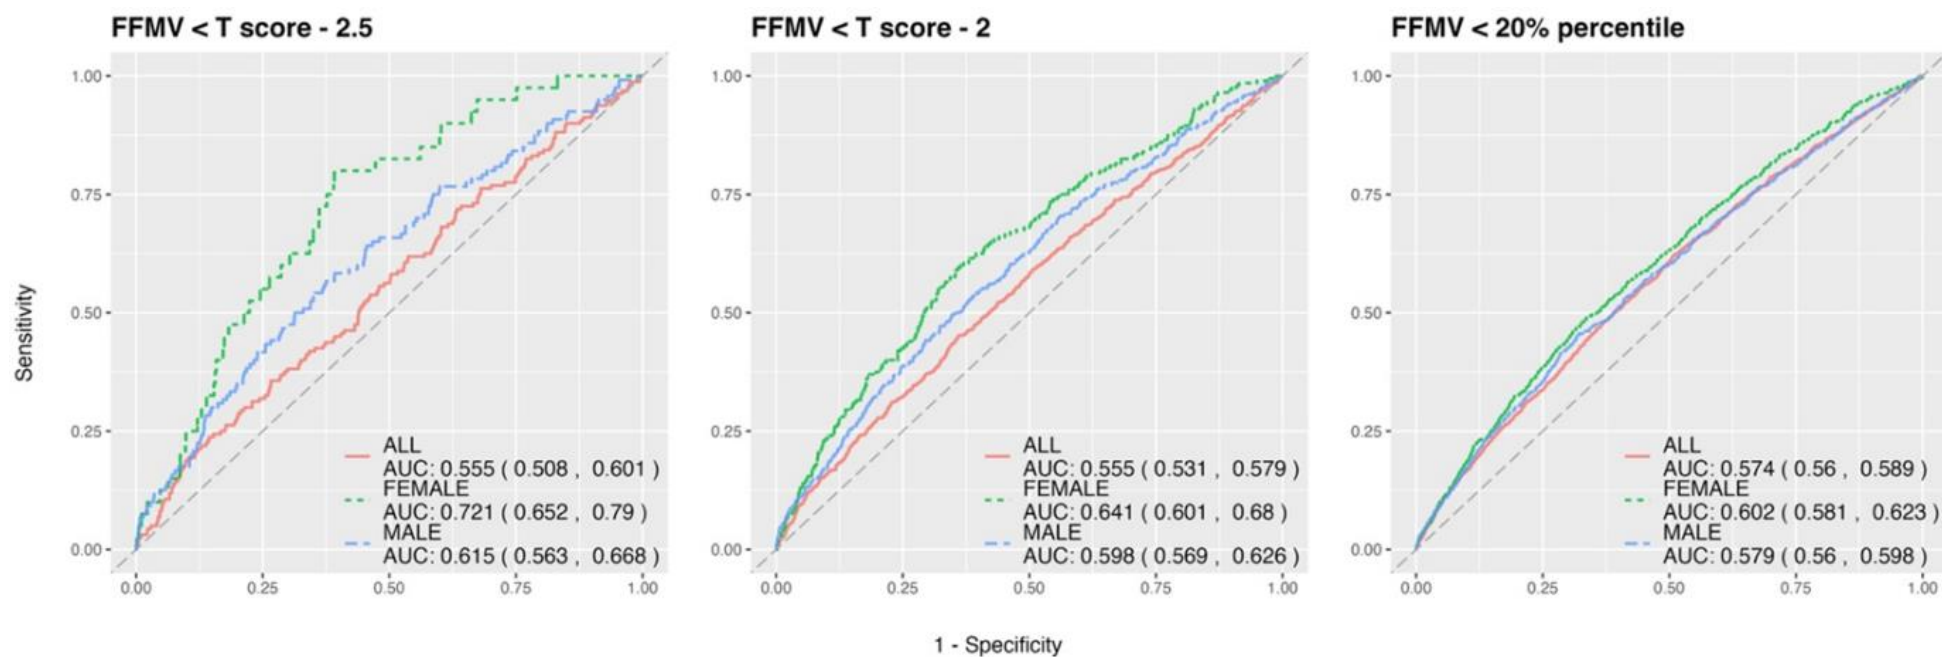

Supplemental eFigure 5. Receiver operator characteristic curves shows the diagnostic power of Cr:Cyc for identifying low ALM/BMI or ALM/Height<sup>2</sup> using cutpoints. Models are unadjusted.

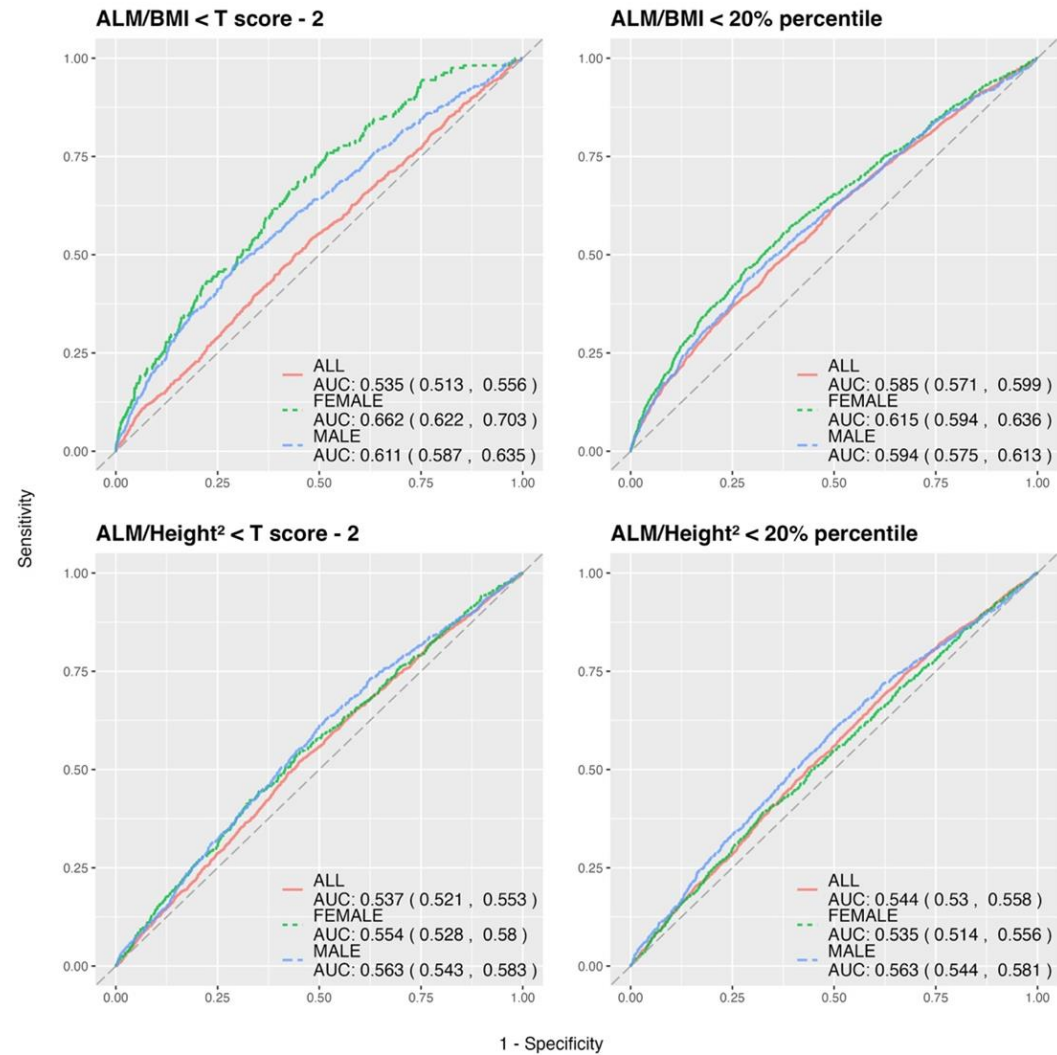

Supplemental eFigure 6. Receiver operator characteristic curves shows the diagnostic power of Cr:Cyc for identifying low grip strength using cutpoints. Models are unadjusted.

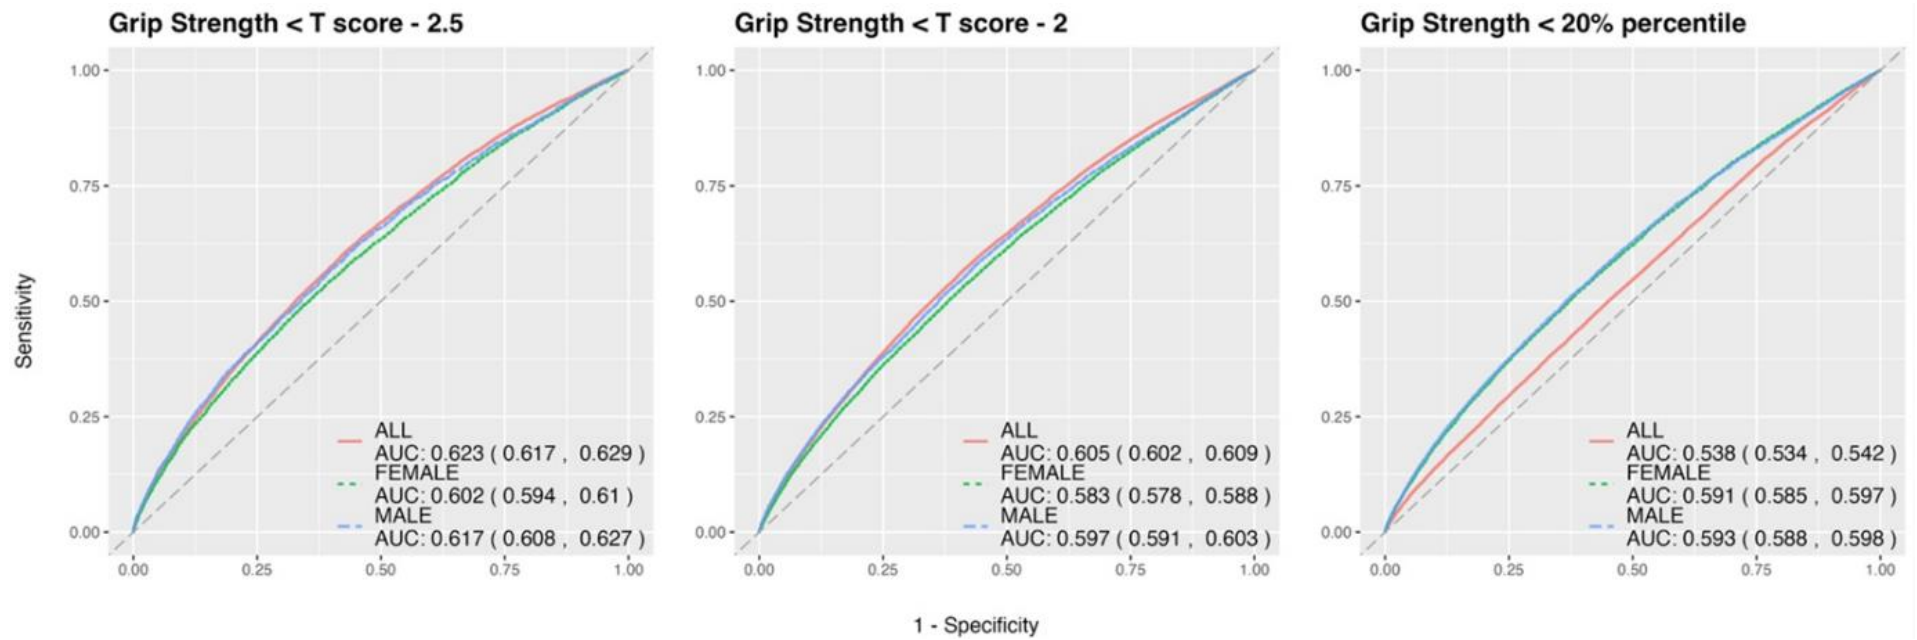

Supplemental eFigure 7. Receiver operator characteristic curves shows the diagnostic power using the biomarker difference between Creatinine and Cystatin C for identifying low grip strength or low FFMV using cutpoints. Models are unadjusted.

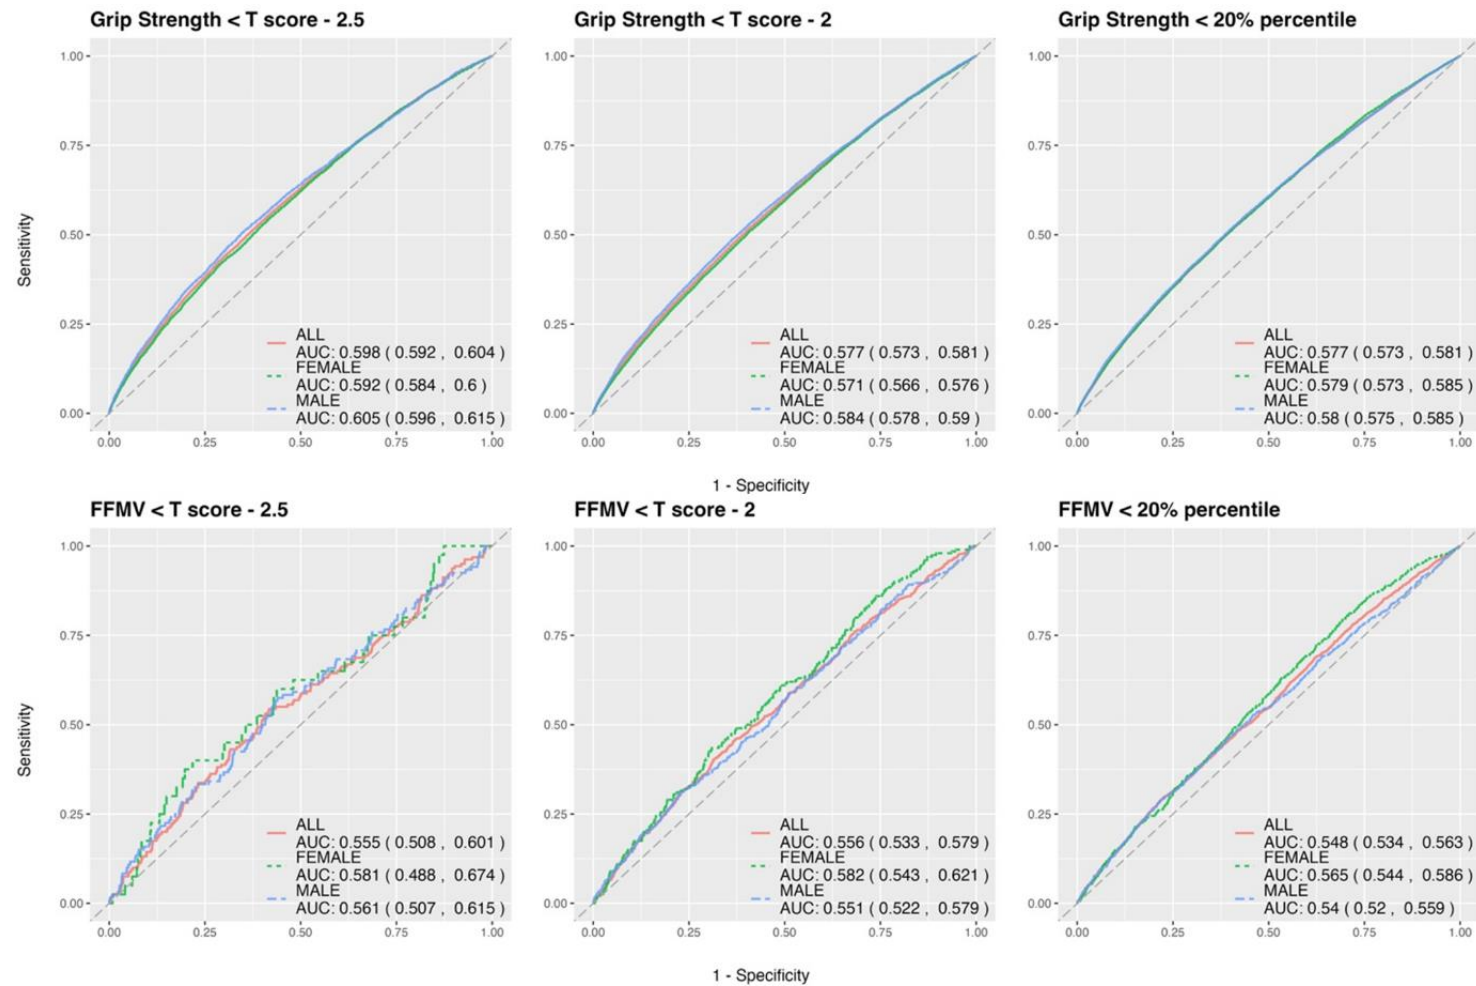

Supplemental eFigure 8. Receiver operator characteristic curves shows the diagnostic power using the biomarker difference between Creatinine and Cystatin C for identifying low ALM/BMI or ALM/Height<sup>2</sup> using cutpoints. Models are unadjusted.

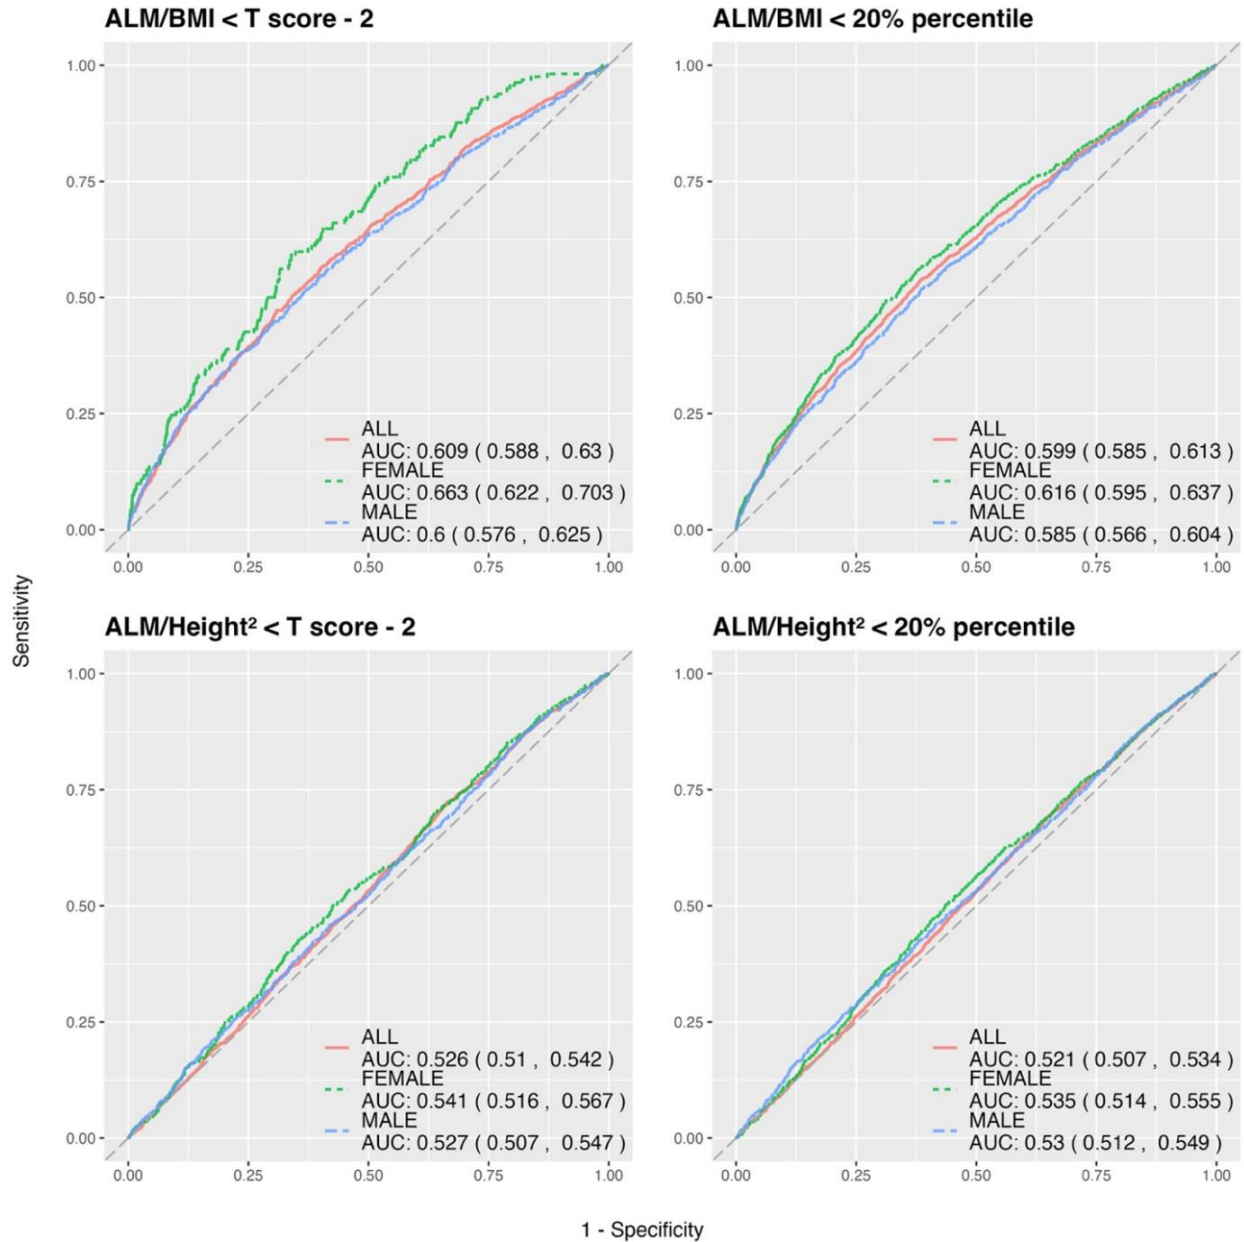

Supplemental eFigure 9. Receiver operator characteristic curves shows the diagnostic power using the biomarker difference between Creatinine and Cystatin C for identifying low grip strength or low FFMV using cutpoints. Models are fully-adjusted.

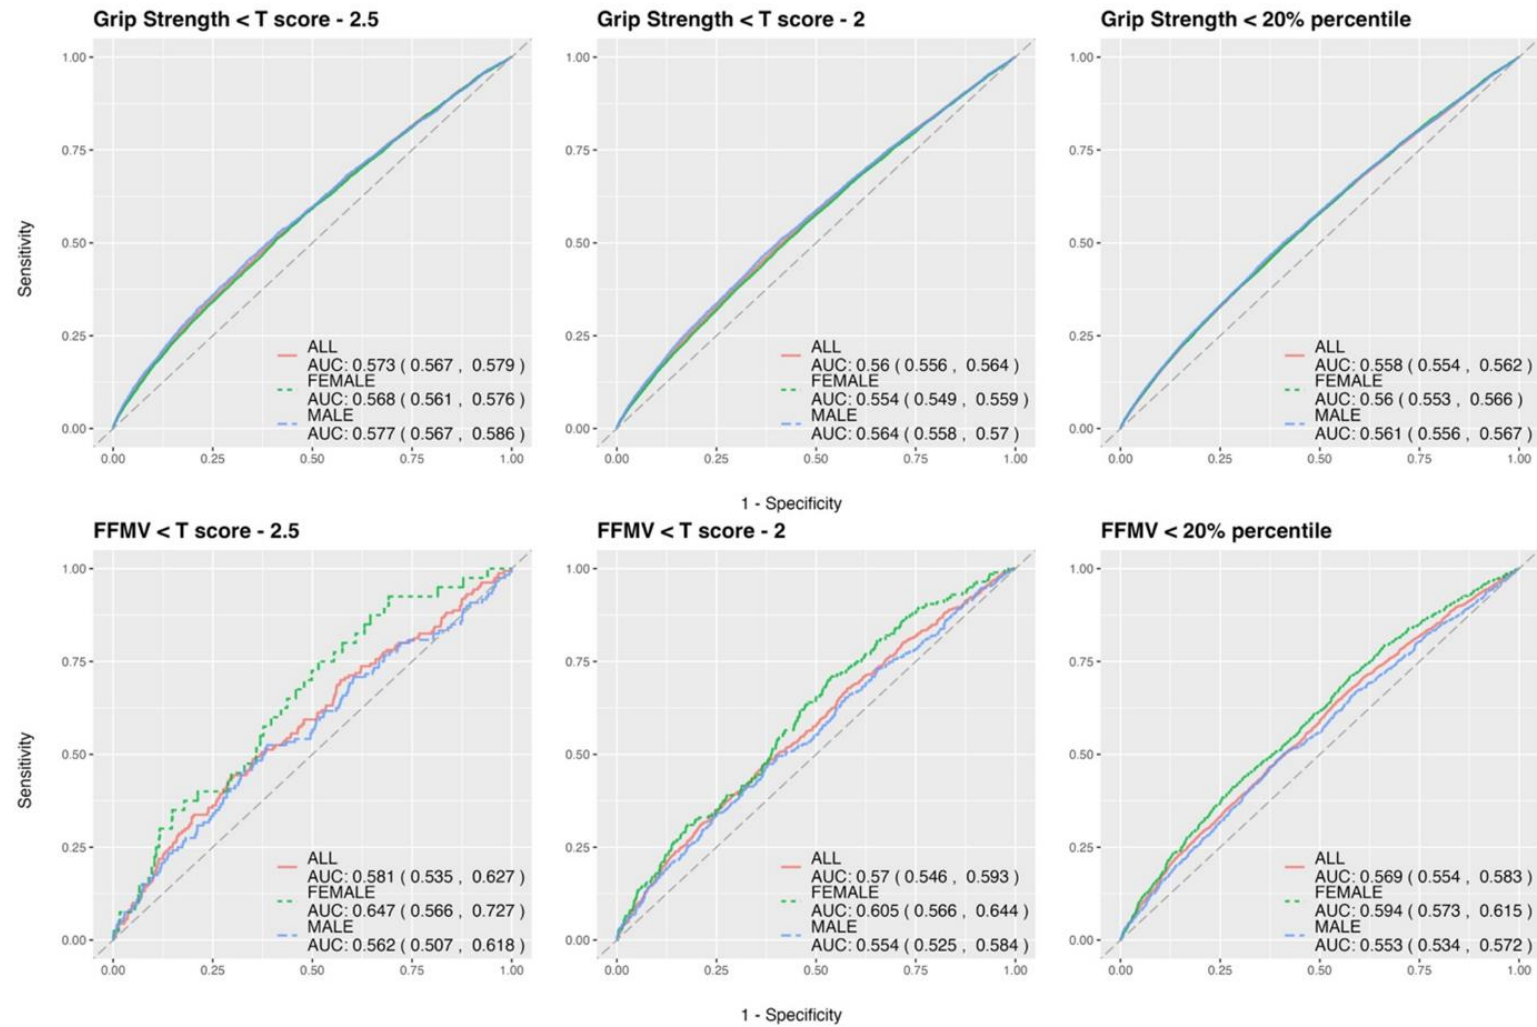

Supplemental eFigure 10. Receiver operator characteristic curves shows the diagnostic power using the biomarker difference between Creatinine and Cystatin C for identifying low ALM/BMI or ALM/Height<sup>2</sup> using cutpoints. Models are fully-adjusted.

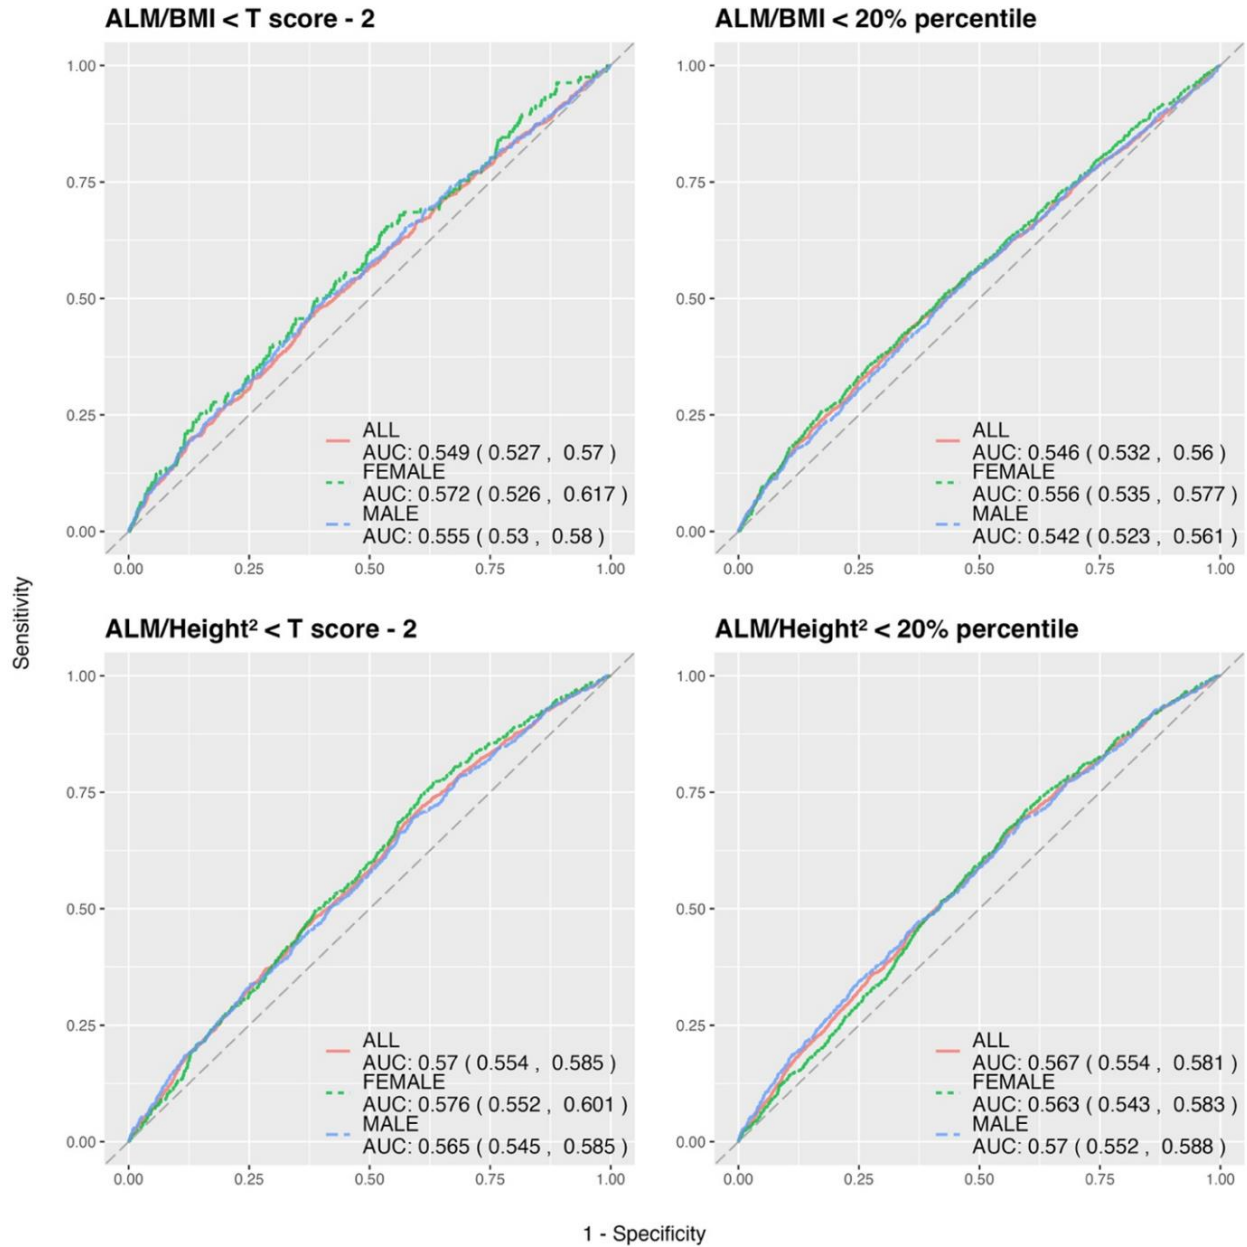

Supplement: glae274_suppl_supplementary_materials.pdf [file glae274_suppl_supplementary_materials.pdf]
